# Supplementary material for: Cognitive processes in goal-directed attentional system dysfunction of generalized anxiety disorder
Source: Research Square preprint supplement (doi:10.21203/rs.3.rs-6320865/v1), 2025-05-16
Supplement: Supplementary file 1 [file 2462863f965f947a0e01e403.docx]

**Supplementary Information**

**Supplementary Information for *3 Results***

A total of 52 participants were included in the study (24 patients with GAD and 28 healthy controls). Of these participants, 22 patients with GAD and 26 healthy controls completed the Go/No-Go task, while 21 patients with GAD and 25 healthy controls completed the more-odd shifting task.

| **Subject Number** | **Go/No-Go task** | **More-odd shifting task** |
| --- | --- | --- |
| **Sub1** | **√** |  |
| **Sub2** |  | **√** |
| **Sub3** | **√** |  |
| **Sub4** |  | **√** |
| **Sub5** | **√** | **√** |
| **Sub6** | **√** | **√** |
| **Sub7** | **√** | **√** |
| **Sub8** | **√** | **√** |
| **Sub9** | **√** | **√** |
| **Sub10** | **√** | **√** |
| **Sub11** | **√** | **√** |
| **Sub12** | **√** | **√** |
| **Sub13** | **√** | **√** |
| **Sub14** | **√** | **√** |
| **Sub15** | **√** | **√** |
| **Sub16** | **√** | **√** |
| **Sub17** | **√** |  |
| **Sub18** | **√** | **√** |
| **Sub19** | **√** | **√** |
| **Sub20** | **√** | **√** |
| **Sub21** | **√** | **√** |
| **Sub22** | **√** | **√** |
| **Sub23** | **√** | **√** |
| **Sub24** | **√** | **√** |
| **Total** | **22** | **21** |

**Supplementary Table 1.** Details of participants with GAD in Go/No-Go task and more-odd shifting task.

√:complete the task

**Supplementary Table 2**. Details of healthy controls in Go/No-Go task and more-odd shifting task.

| **Subject Number** | **Go/No-Go task** | **More-odd shifting task** |
| --- | --- | --- |
| **Sub1** | **√** | **√** |
| **Sub2** | **√** | **√** |
| **Sub3** | **√** | **√** |
| **Sub4** | **√** | **√** |
| **Sub5** | **√** | **√** |
| **Sub6** | **√** | **√** |
| **Sub7** | **√** | **√** |
| **Sub8** | **√** | **√** |
| **Sub9** | **√** | **√** |
| **Sub10** | **√** | **√** |
| **Sub11** | **√** | **√** |
| **Sub12** | **√** | **√** |
| **Sub13** | **√** | **√** |
| **Sub14** | **√** | **√** |
| **Sub15** | **√** | **√** |
| **Sub16** | **√** | **√** |
| **Sub17** |  | **√** |
| **Sub18** | **√** | **√** |
| **Sub19** | **√** | **√** |
| **Sub20** | **√** | **√** |
| **Sub21** | **√** | **√** |
| **Sub22** | **√** | **√** |
| **Sub23** | **√** |  |
| **Sub24** | **√** | **√** |
| **Sub25** | **√** | **√** |
| **Sub26** | **√** |  |
| **Sub27** | **√** |  |
| **Sub28** |  | **√** |
| **Total** | **26** | **25** |

√:complete the task

Regarding the Go/No-Go task, only trials with RTs between 200 ms and 800 ms were included in the analysis. Additionally, only averaged responses with at least 30 artifact-free segments from correct No-Go trials were included in further analyses. One healthy control was excluded for failing to complete the required number of trials on the hard level, and two patients with GAD were excluded from the analysis for similar reasons. Additionally, one patient with GAD and five healthy controls were excluded due to EEG equipment malfunction.

Regarding the more-odd shifting task, all trials except the first trial of each block were included in the ACC data, and only correct trials were analyzed for the RT data (Kray et al., 2005; Kray & Lindenberger, 2000). One GAD patient and five healthy controls were excluded due to EEG equipment malfunction, and one GAD patient was excluded for failing to achieve the required 80 % accuracy. **After exclusions, 39 participants remained for statistical analysis: 19 GAD patients and 20 healthy controls, who completed the Go/No-Go and more-odd shifting tasks.**

Table 1 presents the clinical and demographic characteristics of the two groups in the Go/No-Go task, along with statistical comparisons. Chi-squared analysis showed no significant difference in gender between the groups (χ2 (1) = 0.011, *p* = 0.915). The Mann-Whitney U test showed no significant difference in education level between the GAD and HC groups (Z = -0.118, *p* = 0.923). Age did not differ significantly between the groups (Z = -1.677, *p* = 0.101).

**Supplementary** **Table 3**. Clinical and demographic variables of the participants in the Go/No-Go task.

| Variables | HC group | GAD group | *Z/χ2* | *p* |
| --- | --- | --- | --- | --- |
| mean (SD) | (n = 20) | (n = 19) |  |  |
| Age (years) | 28.50 (9.88) | 29.79 (7.18) | −1.622 | 0.113 |
| Gender (Female/Male) | 15/5 | 12/7 | 0.641 | 0.423 |
| Education (years) | 16.70 (2.30) | 17.16 (2.46) | 0.512 | 0.55 |
| HAMA score | 1.70 (1.84) | 18.32 (4.42) | −5.374 | 0.00 |
| HAMD score | 1.45 (1.50) | 11.11 (4.16) | −5.370 | 0.00 |

Note: SD, standard deviation; GAD, generalized anxiety disorder; HC, healthy controls; HAMA, Hamilton anxiety scale; HAMD Hamilton depression rating scale

Table 2 presents the clinical and demographic characteristics of the two groups for the more-odd shifting task, along with statistical comparisons. Chi-squared analysis revealed no significant difference in gender distribution between the groups (χ2 (1) = 0.641, *p* = 0.423). Similarly, the Mann-Whitney U test showed no significant difference in education level (Z = 0.512, *p* = 0.550) or age (Z = -1.622, *p* = 0.113) between the GAD and HC groups.

**Supplementary Table 4**.Demographic variables of the participants in more-odd shifting task.

| Variables | HC group | GAD group | *Z*/*χ*2 | *p* |
| --- | --- | --- | --- | --- |
| mean (SD) | (n = 20) | (n = 19) |  |  |
| Age (years) | 27.30 (6.47) | 30.47 (7.09) | −1.677 | 0.101 |
| Gender (Female/Male) | 14/6 | 13/6 | 0.011 | 0.915 |
| Education (years) | 16.70 (2.46) | 17.32 (2.40) | −0.118 | 0.923 |
| HAMA score | 2.10 (1.94) | 18.63 (4.44) | −5.360 | 0.00 |
| HAMD score | 2.30 (2.13) | 12.21 (3.91) | −5.269 | 0.00 |

Note: SD, standard deviation; GAD, generalized anxiety disorder; HC, healthy controls; HAMA, Hamilton anxiety scale; HAMD Hamilton depression rating scale

- - 1. **Supplementary Information for *3.4.2* *More-odd shifting task***

**Supplementary Table 5, 6** summarized the statistical results from the repeated measures ANOVA of theta power, along with Bonferroni post-hoc comparisons between the groups.

**Supplementary Table 5**. Experimental effects in the theta band of the more-odd shifting task.

| *F* |  | | | | |
| --- | --- | --- | --- | --- | --- |
| Condition  (*p*, partial *ηp*²) | Region | Group | Condition * Region | Condition * Group | Condition * Group * Region |
| **14.592*****  (0.000, 0.283) | **20.428*****  (0.000, 0.706) | 3.065  (0.088, 0.077) | **5.917*****  (0.001, 0.410) | 1.259  (0.269, 0.033) | 0.884  (0.484, 0.094) |

****p* < 0.001

**Supplementary Table 6**. Bonferroni post-hoc comparisons in the theta band of the more-odd shifting task

| Bonferroni post-hoc comparisons in the theta band |
| --- |
| **Condition** |
| Congruent < Incongruent |
| **Region** |
| Frontal > Central, Parietal, Temporal, Occipital; Parietal < Temporal, Occipital; Central > Parietal, Temporal |
| **Condition * Region** |
| GAD: Frontal > Central, Parietal, Temporal, Occipital; Central > Parietal, Temporal, Occipital; |
| HC: Frontal > Central, Parietal, Temporal; Parietal < Temporal, Occipital; Central > Parietal |

Kray, J., Eppinger, B., & Mecklinger, A. (2005). Age differences in attentional control: An event-related potential approach. *Psychophysiology*, 42(4), 407–416. <https://doi.org/10.1111/j.1469-8986.2005.00298.x>

Kray, J., & Lindenberger, U. (2000). Adult age differences in task switching. *Psychology and Aging*, 15(1), 126–147. <https://doi.org/10.1037//0882-7974.15.1.126>
